# Supplementary material
Source: PubMed Central journal article supplement (PMC5038274)
Supplement: AAC.00910-16_zac010165547so1.pdf [file AAC.00910-16_zac010165547so1.pdf]

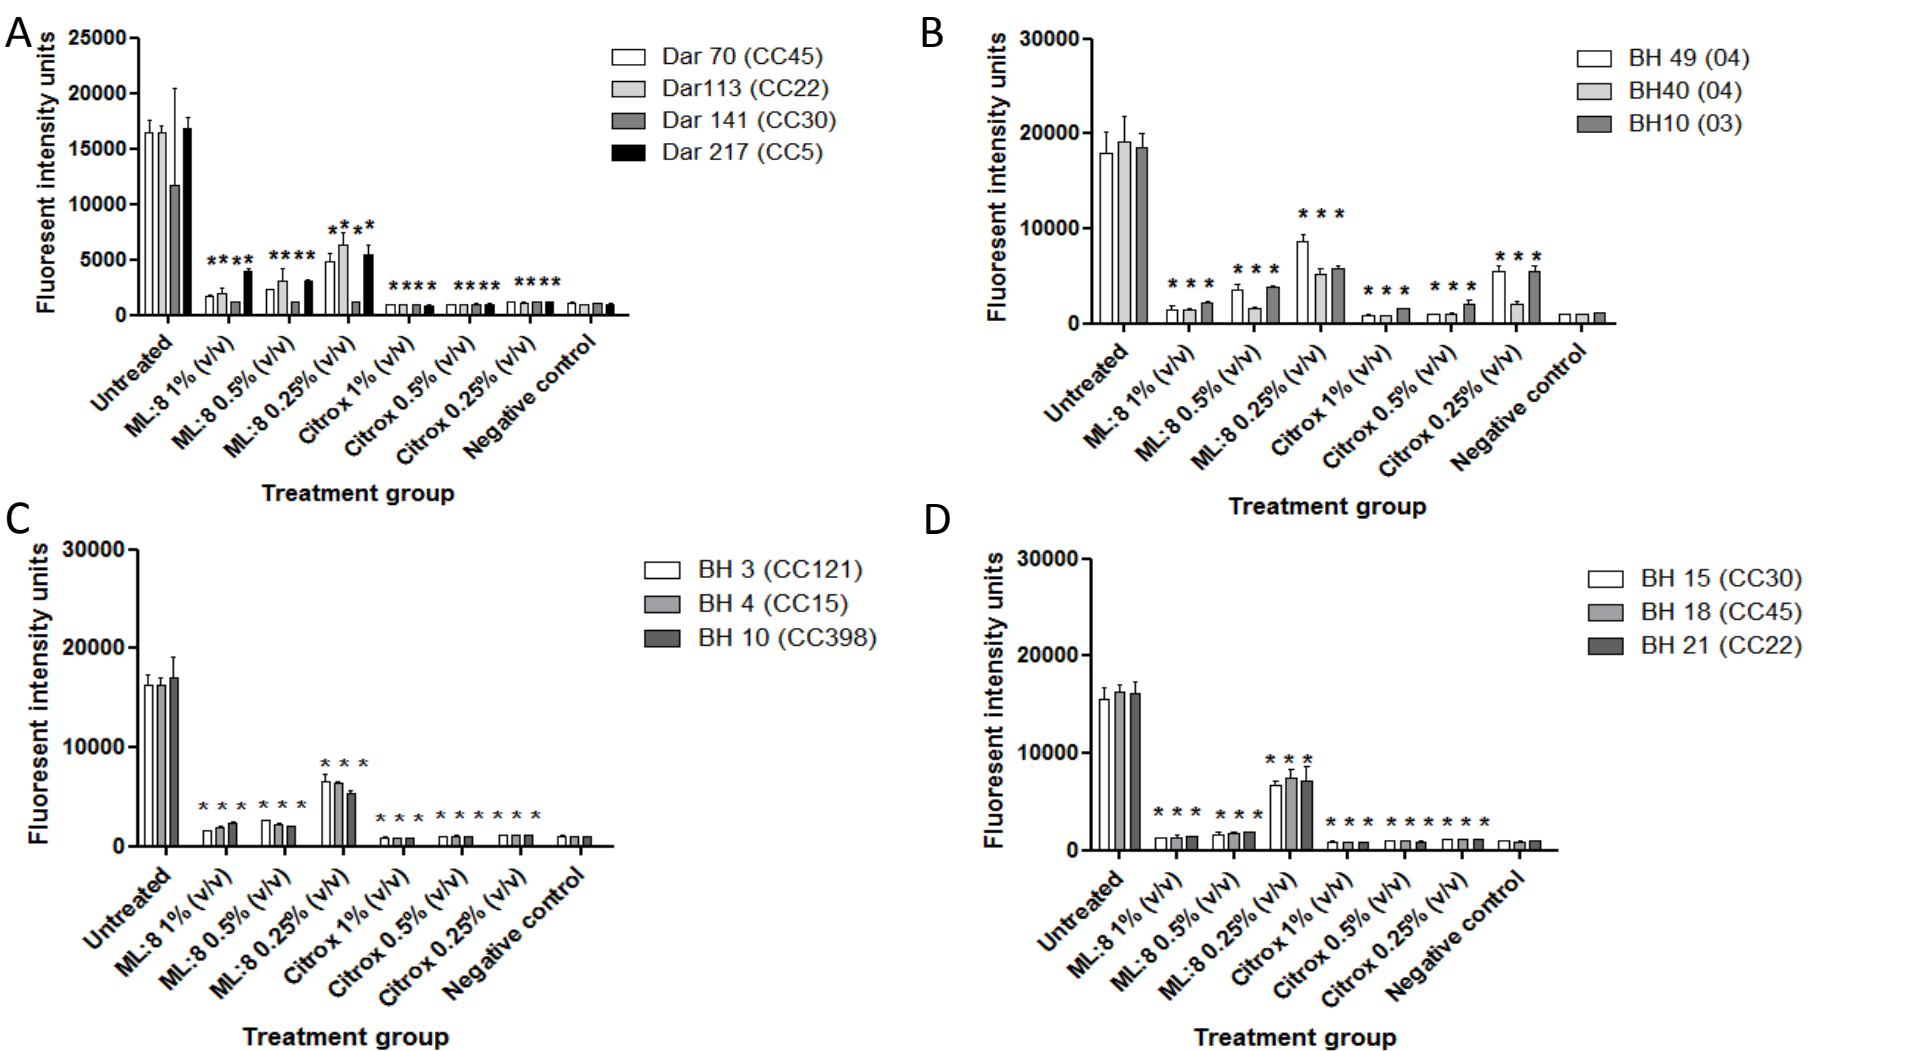

### Supplementary figure 1 The effect of ML:8 and Citrox on biofilm formed by range of clonal complexes following 24 h treatment.

All strains were grown in RPMI-1640. Biofilms were grown in 96 well plates pre-coated with 20% human plasma at 37°C for 24 h. Test wells were either left untreated or treated with ML:8 or Citrox for a further 24 h. RPMI-1640 media was used as a negative control. Assays were performed in triplicate and data represents mean fluorescent units  $\pm$  SD. Statistically significant results are indicated (two tailed student *t*-tests vs untreated,  $P \leq 0.05$  \*)

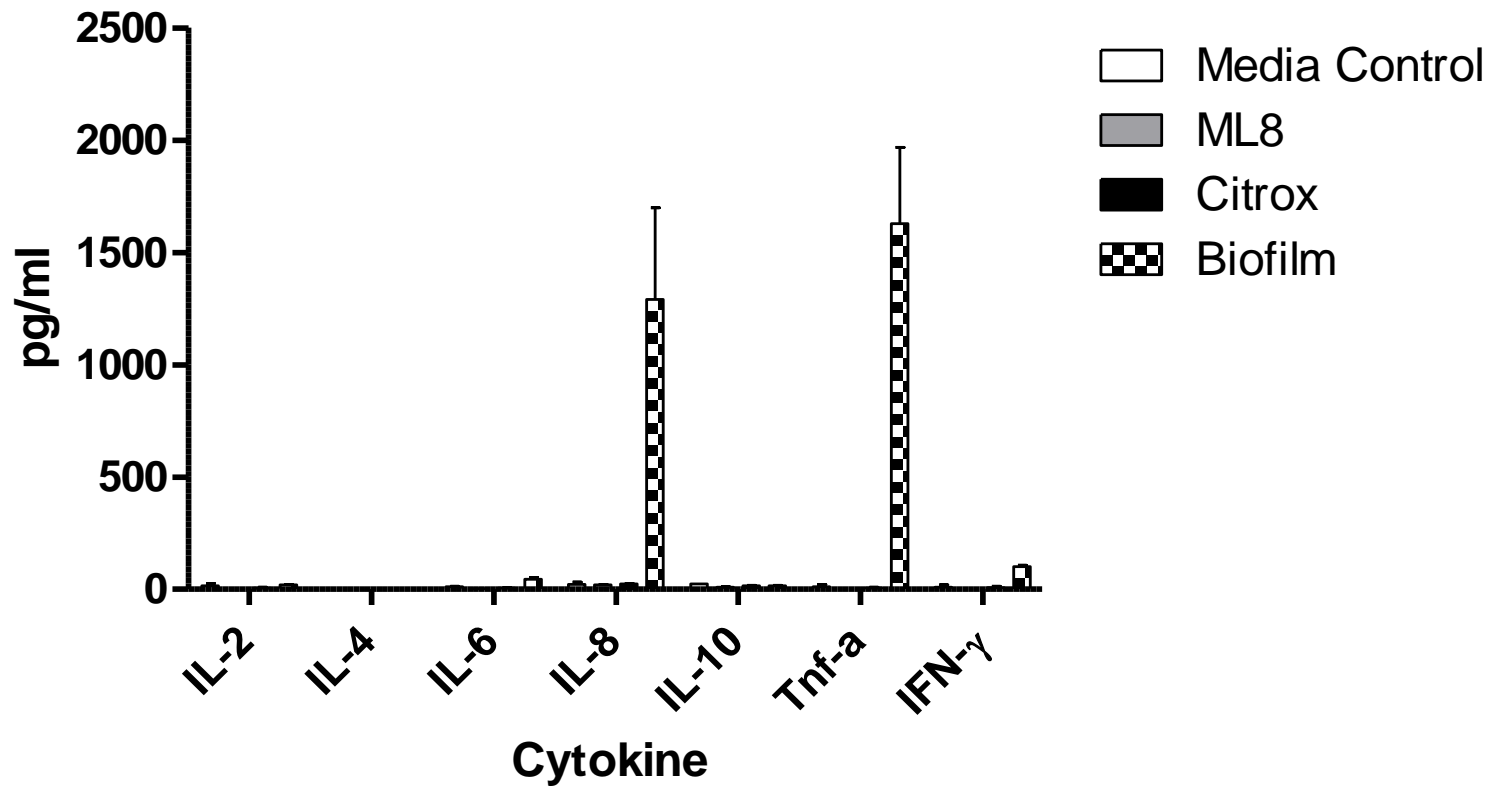

**Supplementary figure 2: Cytokine responses to exposure to ML:8 and Citrox .** Human blood and test agents ML:8, Citrox (0.06% v/v and 0.03% v/v respectively), media control, *S. aureus* biofilm cells were incubated for 2 h. Samples were centrifuged and serum harvested. Cytokine response was examined using a bioplex-pro assay. Data represents mean pg/ml concentrations of cytokines  $\pm$  S.D, three donors were used for each experiment. Significant induction compared to media control is shown (one tailed student-T test  $P \leq 0.5$ ).
